# Supplementary material for: Tobacco and Alcohol Consumption Rates among Chinese Women of Reproductive Age in 2004–2011: Rate and Sociodemographic Influencing Factors
Source: PubMed Central journal article supplement (PMC6339028; doi:10.3390/ijerph16010056), 2018-12-26
Supplement: ijerph-16-00056-s001.pdf [file ijerph-16-00056-s001.pdf]

**Table S1.** Characteristics of 10,934 participants stratified by survey year (N, %).

| Variable                    |                   | 2004 |       | 2006 |       | 2009 |       | 2011 |       | Total |       |
|-----------------------------|-------------------|------|-------|------|-------|------|-------|------|-------|-------|-------|
|                             |                   | N    | %     | N    | %     | N    | %     | N    | %     | N     | %     |
| Residence                   | Urban             | 879  | 33.05 | 832  | 32.27 | 790  | 31.64 | 1261 | 39.42 | 3762  | 34.41 |
|                             | Rural             | 1781 | 66.95 | 1746 | 67.73 | 1707 | 68.36 | 1938 | 60.58 | 7172  | 65.59 |
| Father resides with family  | Yes               | 270  | 10.15 | 255  | 9.89  | 259  | 10.37 | 357  | 11.16 | 1141  | 10.44 |
|                             | No                | 2390 | 89.85 | 2323 | 90.11 | 2238 | 89.63 | 2842 | 88.84 | 9793  | 89.56 |
| Mother resides with family  | Yes               | 318  | 11.95 | 279  | 10.82 | 291  | 11.65 | 415  | 12.97 | 1303  | 11.92 |
|                             | No                | 2342 | 88.05 | 2299 | 89.18 | 2206 | 88.35 | 2784 | 87.03 | 9631  | 88.08 |
| Marital status              | Spinster          | 251  | 9.44  | 246  | 9.54  | 249  | 9.97  | 325  | 10.16 | 1071  | 9.80  |
|                             | Married           | 2409 | 90.56 | 2332 | 90.46 | 2248 | 90.03 | 2874 | 89.84 | 9863  | 90.20 |
| Household registration type | Urban             | 1025 | 38.53 | 989  | 38.36 | 896  | 35.88 | 1498 | 46.83 | 4408  | 40.31 |
|                             | Rural             | 1635 | 61.47 | 1589 | 61.64 | 1601 | 64.12 | 1701 | 53.17 | 6526  | 69.69 |
|                             | PSB <sup>1</sup>  | 286  | 10.75 | 246  | 9.54  | 207  | 8.29  | 270  | 8.44  | 1009  | 9.23  |
| Highest educational level   | SPSG <sup>2</sup> | 1566 | 58.87 | 1553 | 60.24 | 1561 | 62.52 | 1694 | 52.95 | 6374  | 59.30 |
|                             | HSTS <sup>3</sup> | 653  | 24.55 | 601  | 23.31 | 533  | 21.35 | 715  | 22.35 | 2502  | 22.88 |
|                             | UA <sup>4</sup>   | 155  | 5.83  | 178  | 6.90  | 196  | 7.85  | 520  | 16.26 | 1049  | 9.59  |
| Current educational status  | Yes <sup>5</sup>  | 78   | 2.93  | 70   | 2.72  | 66   | 2.64  | 126  | 3.94  | 340   | 3.11  |
|                             | No <sup>6</sup>   | 2582 | 97.07 | 2508 | 97.28 | 2431 | 97.36 | 3073 | 96.06 | 10594 | 96.89 |
| Employment status           | Yes               | 1735 | 34.77 | 1802 | 69.90 | 1789 | 71.65 | 2325 | 72.68 | 7651  | 69.97 |
|                             | No                | 925  | 65.23 | 776  | 30.10 | 708  | 28.35 | 874  | 27.32 | 3283  | 30.03 |

<sup>1</sup> Primary school and below; <sup>2</sup> Secondary and primary school graduates; <sup>3</sup> High school and secondary technical school; <sup>4</sup> University or above; <sup>5</sup> Students; <sup>6</sup> Participants who do not attend school.

Table S2. Penalised logistic regression analysis of tobacco consumption amongst adult women of reproductive age.

| Tobacco consumption         |                      |          |                 |          |          |        |          |          |        |          |          |         |          |
|-----------------------------|----------------------|----------|-----------------|----------|----------|--------|----------|----------|--------|----------|----------|---------|----------|
| Variable                    |                      | 2004     |                 |          | 2006     |        |          | 2009     |        |          | 2011     |         |          |
|                             |                      | Estimate | SE <sup>1</sup> | p-value  | Estimate | SE     | p-value  | Estimate | SE     | p-value  | Estimate | SE      | p-value  |
| Residence                   | Rural vs. Urban      | -0.2643  | 0.1864          | 0.1562   | -0.1853  | 0.1709 | 0.2783   | -0.0724  | 0.2009 | 0.7185   | -0.0443  | 0.1609  | 0.7829   |
| Age                         |                      | 0.0480   | 0.0274          | 0.0792   | 0.0491   | 0.0243 | 0.0428*  | 0.0859   | 0.0281 | 0.0022** | 0.0537   | 0.0227* | 0.0179*  |
| Father resides with family  | No vs. Yes           | 0.2022   | 0.5146          | 0.6944   | -0.2364  | 0.7600 | 0.7557   | 1.3174   | 0.7431 | 0.0763   | -0.0698  | 0.4915  | 0.8871   |
| Mother resides with family  | No vs. Yes           | -0.5407  | 0.4354          | 0.2142   | 0.1744   | 0.7150 | 0.8073   | 0.1297   | 0.5108 | 0.7996   | 0.4473   | 0.5042  | 0.3750   |
| Marital status              | Married vs. Spinster | -0.0938  | 0.5059          | 0.8529   | 0.0602   | 0.5952 | 0.9195   | -1.3067  | 0.4180 | 0.0018** | -0.8045  | 0.3616  | 0.0261*  |
| Household registration type | Rural vs. Urban      | 0.3666   | 0.2324          | 0.1148   | 0.6040   | 0.2302 | 0.0087** | 0.2631   | 0.2333 | 0.2594   | -0.0480  | 0.1714  | 0.7797   |
|                             | SPSG vs. PSB         | -0.0149  | 0.3004          | 0.9604   | 0.4677   | 0.4003 | 0.2428   | 0.1428   | 0.3111 | 0.6462   | 0.3624   | 0.2437  | 0.1369   |
| Highest educational level   | HSTS vs. PSB         | -0.8912  | 0.4172          | 0.0327*  | -0.2245  | 0.4743 | 0.6360   | -0.5705  | 0.4329 | 0.1876   | -0.2385  | 0.3150  | 0.4489   |
|                             | UA vs. PSB           | 0.2736   | 0.5511          | 0.6196   | -1.0256  | 1.0199 | 0.3146   | 0.0581   | 0.5485 | 0.9157   | -0.5785  | 0.4097  | 0.1580   |
| Current educational status  | No vs. Yes           | 0.3934   | 0.6817          | 0.5638   | -0.6933  | 0.3131 | 0.0268*  | 0.1010   | 0.6798 | 0.8819   | 0.00247  | 0.4084  | 0.9952   |
| Employment status           | No vs. Yes           | 0.0399   | 0.1798          | 0.8242   | 0.0349   | 0.1619 | 0.8292   | 0.1747   | 0.1873 | 0.3510   | 0.00592  | 0.1639  | 0.9712   |
| Alcohol consumption         | Yes vs. No           | 0.6198   | 0.1787          | 0.0005** | 0.6125   | 0.1847 | 0.0009** | 0.8331   | 0.2103 | <.0001** | 0.6271   | 0.1684  | 0.0002** |

<sup>1</sup> SE, standard error; \* Statistically significant ( $p < 0.05$ ); \*\* Statistically significant ( $p < 0.01$ ).

Table S3. Penalised logistic regression analysis of alcohol consumption amongst adult women of reproductive age.

| Variable                    |                      | Alcohol consumption |                 |          |          |        |          |          |        |          |          |         |          |
|-----------------------------|----------------------|---------------------|-----------------|----------|----------|--------|----------|----------|--------|----------|----------|---------|----------|
|                             |                      | 2004                |                 |          | 2006     |        |          | 2009     |        |          | 2011     |         |          |
|                             |                      | Estimate            | SE <sup>1</sup> | p-value  | Estimate | SE     | p-value  | Estimate | SE     | p-value  | Estimate | SE      | p-value  |
| Residence                   | Rural vs. Urban      | -0.3735             | 0.0654          | <.0001** | -0.3039  | 0.0821 | 0.0002** | -0.4274  | 0.0824 | <.0001** | -0.3559  | 0.0646  | <.0001** |
| Age                         |                      | -0.00453            | 0.00890         | 0.6107   | 0.0192   | 0.0116 | 0.0969   | 0.0113   | 0.0112 | 0.3127   | 0.0183   | 0.00871 | 0.0353*  |
| Father resides with family  | No vs. Yes           | 0.3262              | 0.2058          | 0.1129   | 0.4846   | 0.2392 | 0.0427*  | -0.0783  | 0.2146 | 0.7153   | -0.2415  | 0.1749  | 0.1673   |
| Mother resides with family  | No vs. Yes           | -0.1742             | 0.1911          | 0.3619   | -0.5582  | 0.2280 | 0.0144*  | -0.1366  | 0.2096 | 0.5148   | 0.3319   | 0.1800  | 0.0652   |
| Marital status              | Married vs. Spinster | 0.2793              | 0.1857          | 0.1326   | 0.1199   | 0.2098 | 0.5675   | 0.0268   | 0.1905 | 0.8881   | -0.1658  | 0.1481  | 0.2629   |
| Household registration type | Rural vs. Urban      | -0.0425             | 0.0736          | 0.5635   | 0.00817  | 0.0906 | 0.9281   | -0.0532  | 0.0930 | 0.5675   | 0.1319   | 0.0753  | 0.0799   |
|                             | SPSG vs. PSB         | -0.4426             | 0.1020          | <.0001** | -0.3374  | 0.1276 | 0.0082** | -0.5695  | 0.1386 | <.0001** | -0.4748  | 0.1058  | <.0001** |
| Highest educational level   | HSTS vs. PSB         | 0.0494              | 0.1073          | 0.6452   | 0.0268   | 0.1371 | 0.8448   | 0.3146   | 0.1394 | 0.0240*  | 0.1824   | 0.1121  | 0.1038   |
|                             | UA vs. PSB           | 0.5609              | 0.1665          | 0.0008** | 0.8257   | 0.1856 | <.0001** | 0.7931   | 0.1807 | <.0001** | 0.7303   | 0.1283  | <.0001** |
| Current educational status  | No vs. Yes           | 0.0408              | 0.1859          | 0.8263   | -0.4776  | 0.1797 | 0.0079** | 0.1213   | 0.2275 | 0.5940   | -0.00628 | 0.1559  | 0.9678   |
| Employment status           | No vs. Yes           | -0.2361             | 0.0676          | 0.0005** | -0.2252  | 0.0898 | 0.0121*  | -0.0274  | 0.0874 | 0.7536   | -0.1768  | 0.0727  | 0.0150*  |
| Tobacco consumption         | Yes vs. No           | 0.6226              | 0.1900          | 0.0010** | 0.6213   | 0.1936 | 0.0013** | 0.8178   | 0.2218 | 0.0002** | 0.6323   | 0.1783  | 0.0004** |

<sup>1</sup> SE, standard error; \* Statistically significant (p < 0.05); \*\* Statistically significant (p < 0.01).
